# Supplementary material for: Monocyte-derived and M1 macrophages from ankylosing spondylitis patients released higher TNF-α and expressed more IL1B in response to BzATP than macrophages from healthy subjects
Source: PubMed Central journal article supplement (PMC8426480; doi:10.1038/s41598-021-96262-2), 2021-09-08
Supplement: 41598_2021_96262_MOESM1_ESM.pdf [file 41598_2021_96262_MOESM1_ESM.pdf]

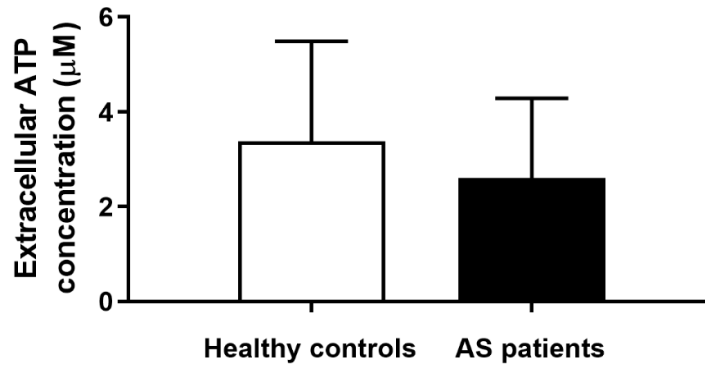

**Supplementary Figure S1.** The level of extracellular ATP in the supernatant of monocyte-derived macrophages from AS patients and controls. M2-like macrophages from AS patients and healthy persons release  $2.6 \pm 1.6 \mu\text{M}$  and  $3.3 \pm 2.1 \mu\text{M}$  extracellular ATP into the supernatant respectively. The data is presented as the mean  $\pm$  SD.

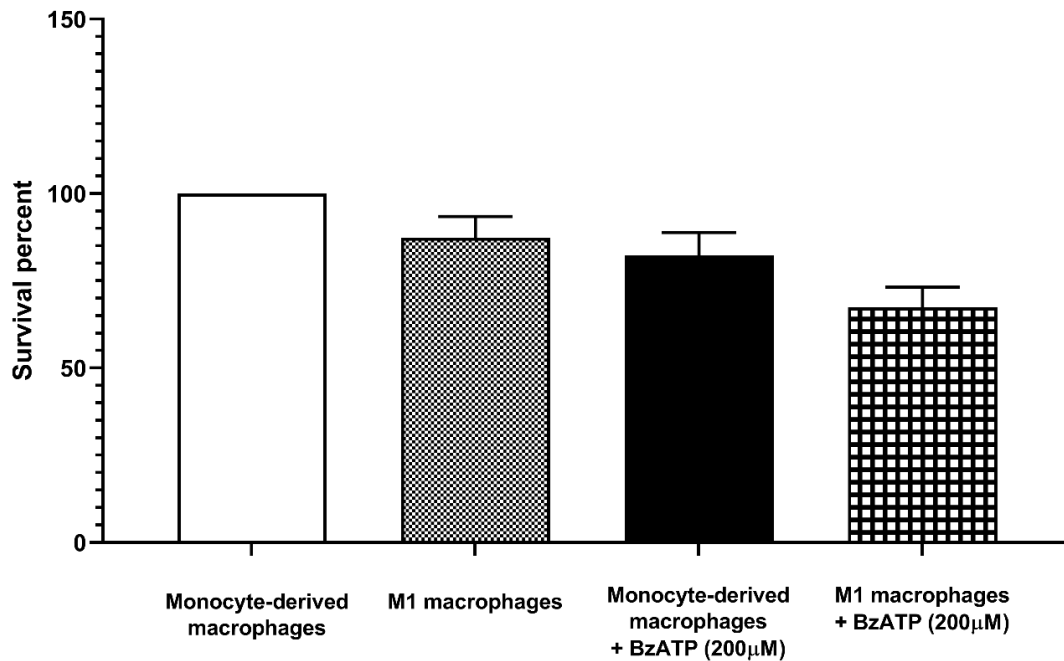

**Supplementary Figure S2.** The cellular viability of BzATP-treated and untreated monocyte-generated and M1 macrophages assessed by MTT assay. The cellular death rate of monocyte-derived macrophages after 200 µM BzATP treatment was 17.7% and the cellular death rate of M1 macrophages with and without 200 µM BzATP was 32.5% and 12.6% respectively. The data is presented as the mean ± SEM.

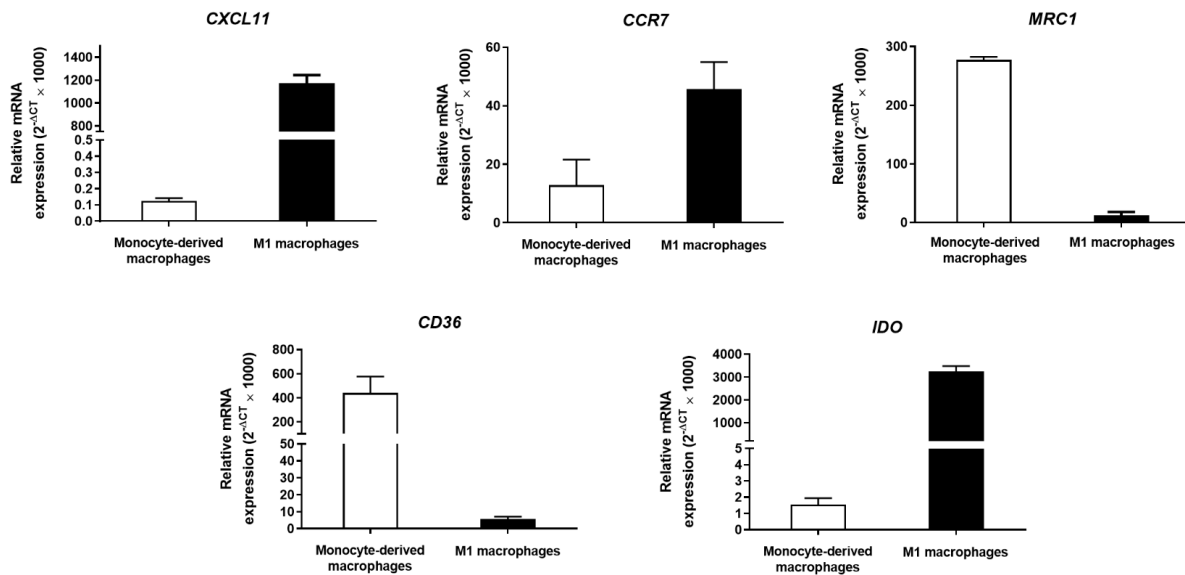

**Supplementary Figure S3.** Expression of macrophages specific markers in monocyte derived macrophages and M1 macrophages. After 24 hours' incubation with LPS and IFN- $\gamma$ , the expression of CXCL11, CCR7 and IDO (M1 macrophages specific markers) was increased and the expression of CD36 and MRC1 (M2 macrophage specific markers) was decreased in macrophages.
